# Supplementary material for: Social media in public health: an analysis of national health authorities and leading causes of death in Spanish-speaking Latin American and Caribbean countries
Source: Springer Nature journal article supplement (doi:10.1186/s12911-017-0411-y), 2017-02-03
Supplement: MOESM1 [file 12043626]

**Additional file 1. List of keywords and synonyms on leading causes of death.  
Source: DeCS (Spanish)**

| <b>Causa de defunción<br/>(palabra clave utilizada por<br/>OMS)</b> | <b>Sinónimos (DeCS)</b>           |
|---------------------------------------------------------------------|-----------------------------------|
| <b>Accidente cerebrovascular</b>                                    |                                   |
|                                                                     | Ataque                            |
|                                                                     | Ictus                             |
|                                                                     | Ictus Cerebral                    |
|                                                                     | AVC                               |
|                                                                     | Apoplejía                         |
|                                                                     | Ataque Cerebral                   |
|                                                                     | Apoplejía Cerebral                |
|                                                                     | Apoplejía Cerebrovascular         |
|                                                                     | Derrame Cerebral                  |
|                                                                     | Accidente Vascular Encefálico     |
|                                                                     | AVE                               |
|                                                                     | Accidente Vascular del Cerebro    |
|                                                                     | Accidente Vascular Cerebral       |
|                                                                     | Accidente Cerebral Vascular       |
|                                                                     | Accidentes Cerebrovasculares      |
| <b>Anomalías congénitas</b>                                         |                                   |
|                                                                     | Anomalía Congénita                |
|                                                                     | Malformaciones                    |
|                                                                     | Deformidades                      |
|                                                                     | Defectos Congénitos               |
| <b>Asfixia y trauma en el nacimiento</b>                            |                                   |
|                                                                     | Asfixia prenatal (descriptor)     |
| <b>Cáncer de colon y recto</b>                                      |                                   |
|                                                                     | Neoplasias del Colon (descriptor) |
|                                                                     | Cáncer del Colon                  |
|                                                                     | Cáncer de Colon                   |

| <b>Causa de defunción<br/>(palabra clave utilizada por<br/>OMS)</b> | <b>Sinónimos (DeCS)</b>                |
|---------------------------------------------------------------------|----------------------------------------|
|                                                                     | Tumores del Colon                      |
|                                                                     | Neoplasias del Recto (descriptor)      |
|                                                                     | Cáncer de Recto                        |
|                                                                     | Cáncer Rectal                          |
|                                                                     | Tumores Rectales                       |
| <b>Cáncer de estómago</b>                                           |                                        |
|                                                                     | Neoplasias Gástricas (descriptor)      |
|                                                                     | Cáncer de Estómago                     |
|                                                                     | Cáncer Gástrico                        |
|                                                                     | Neoplasias del Estómago                |
|                                                                     | Cáncer del Estómago                    |
| <b>Cáncer de mama</b>                                               |                                        |
|                                                                     | Neoplasias de la Mama (descriptor)     |
|                                                                     | Cáncer de Mama                         |
|                                                                     | Cáncer de la Mama                      |
|                                                                     | Cáncer de Seno                         |
|                                                                     | Cáncer Mamario                         |
|                                                                     | Neoplasias Mamarias                    |
|                                                                     | Tumores de Mama                        |
|                                                                     | Tumores de la Mama                     |
|                                                                     | Tumor de Seno                          |
|                                                                     | Tumores de Seno                        |
|                                                                     | Tumores Mamarios                       |
| <b>Cáncer de próstata</b>                                           |                                        |
|                                                                     | Neoplasias de la Próstata (Descriptor) |
|                                                                     | Cáncer de Próstata                     |
|                                                                     | Cáncer de la Próstata                  |
|                                                                     | Cáncer Prostático                      |
|                                                                     | Neoplasias Prostáticas                 |
|                                                                     | Tumores de la Próstata                 |
|                                                                     | Tumores Prostáticos                    |
| <b>Cáncer de pulmón</b>                                             |                                        |
|                                                                     | Neoplasias Pulmonares (descriptor)     |
|                                                                     | Neoplasia Pulmonar                     |

| <b>Causa de defunción<br/>(palabra clave utilizada por<br/>OMS)</b> | <b>Sinónimos (DeCS)</b>                             |
|---------------------------------------------------------------------|-----------------------------------------------------|
|                                                                     | Neoplasias del Pulmón                               |
|                                                                     | Cáncer del Pulmón                                   |
|                                                                     | Cáncer Pulmonar                                     |
| <b>Cardiopatía isquémica</b>                                        |                                                     |
|                                                                     | Isquemia Miocárdica (descriptor)                    |
| <b>Cirrosis hepática</b>                                            |                                                     |
|                                                                     | Cirrosis del Hígado                                 |
|                                                                     | Fibrosis Hepática                                   |
|                                                                     | Fibrosis del Hígado                                 |
| <b>Complicaciones del parto prematuro</b>                           |                                                     |
|                                                                     | Complicaciones del Trabajo de Parto<br>(descriptor) |
|                                                                     | Complicaciones del Parto                            |
| <b>Diabetes</b>                                                     |                                                     |
|                                                                     | Diabetes Mellitus (descriptor)                      |
| <b>Enfermedad cardíaca hipertensiva</b>                             |                                                     |
|                                                                     | Cardiopatías (descriptor)                           |
|                                                                     | Enfermedades del Corazón                            |
|                                                                     | Enfermedades Cardíacas                              |
| <b>Enfermedad de alzhéimer</b>                                      |                                                     |
|                                                                     | Demencia Senil                                      |
|                                                                     | Demencia Senil Aguda Confusa                        |
|                                                                     | Demencia Tipo Alzheimer                             |
|                                                                     | Demencia Presenil de Alzheimer                      |
|                                                                     | Demencia Senil Tipo Alzheimer                       |
| <b>Enfermedad renal</b>                                             |                                                     |
|                                                                     | Enfermedades Renales (descriptor)                   |
|                                                                     | Nefropatías                                         |
| <b>Enfermedades diarreicas</b>                                      |                                                     |
|                                                                     | Disentería (descriptor)                             |
|                                                                     | Diarrea Aguda                                       |
|                                                                     | Diarrea Infecciosa                                  |
|                                                                     | Diarrea Disentérica                                 |
|                                                                     | Enfermedad Diarreica Infecciosa                     |
| <b>Infección aguda de las vías respiratorias inferiores</b>         |                                                     |

| <b>Causa de defunción<br/>(palabra clave utilizada por<br/>OMS)</b> | <b>Sinónimos (DeCS)</b>                                 |
|---------------------------------------------------------------------|---------------------------------------------------------|
|                                                                     | Infecciones del Sistema Respiratorio<br>(descriptor)    |
|                                                                     | Infecciones de las Vías Respiratorias                   |
|                                                                     | Infecciones del Aparato Respiratorio                    |
|                                                                     | Infecciones del Tracto Respiratorio                     |
|                                                                     | Infecciones Respiratorias                               |
| <b>Lesiones en carretera</b>                                        |                                                         |
|                                                                     | Accidentes de Tránsito (descriptor)                     |
|                                                                     | Accidente de Tránsito                                   |
|                                                                     | Accidente de Tráfico                                    |
|                                                                     | Accidentes de Tráfico                                   |
|                                                                     | Accidentes de Transporte                                |
| <b>Malnutrición protéico-energética</b>                             |                                                         |
|                                                                     | Desnutrición (descriptor)                               |
|                                                                     | Malnutrición                                            |
|                                                                     | Subnutrición                                            |
|                                                                     | Subalimentación                                         |
| <b>Neumopatía obstructiva crónica</b>                               |                                                         |
|                                                                     | Enfermedad Pulmonar Obstructiva Crónica<br>(descriptor) |
|                                                                     | COAD                                                    |
|                                                                     | Obstrucción Crónica del Flujo Aéreo                     |
|                                                                     | Obstrucción del Flujo Aéreo Crónica                     |
|                                                                     | Enfermedad Obstructiva Crónica de las Vías<br>Aéreas    |
|                                                                     | Enfermedad del Pulmón Crónica Obstructiva               |
|                                                                     | Enfermedad Pulmonar Crónica Obstructiva                 |
|                                                                     | EVOC                                                    |
|                                                                     | EPOC                                                    |
|                                                                     | Neumopatía Obstructiva Crónica                          |
| <b>Tuberculosis</b>                                                 |                                                         |
|                                                                     | TB                                                      |
| <b>VIH/SIDA</b>                                                     |                                                         |
|                                                                     | Síndrome de Inmunodeficiencia<br>Adquirida (descriptor) |

| <b>Causa de defunción<br/>(palabra clave utilizada por<br/>OMS)</b> | <b>Sinónimos (DeCS)</b>                           |
|---------------------------------------------------------------------|---------------------------------------------------|
|                                                                     | SIDA                                              |
|                                                                     | Síndrome de Deficiencia Inmunológica<br>Adquirida |
|                                                                     | Síndrome de la Inmunodeficiencia Adquirida        |
| <b>Violencia interpersonal</b>                                      |                                                   |
|                                                                     | Violencia (descriptor)                            |
|                                                                     | Atrocidades                                       |
|                                                                     | Conducta de Ataque                                |
|                                                                     | Violencia Social                                  |
