# Supplementary material for: Social media in public health: an analysis of national health authorities and leading causes of death in Spanish-speaking Latin American and Caribbean countries
Source: Springer Nature journal article supplement (doi:10.1186/s12911-017-0411-y), 2017-02-03
Supplement: MOESM2 [file 12043626]

**Additional file 2. Presence of national health authorities on social media.**

| Country    | Ministry                                | Facebook                                                                                                                                                                                | Twitter                                                                               | Youtube                                                                                                         | Google+                                                                                                               | Flickr                                                                                  | Instagram                                                                           |
|------------|-----------------------------------------|-----------------------------------------------------------------------------------------------------------------------------------------------------------------------------------------|---------------------------------------------------------------------------------------|-----------------------------------------------------------------------------------------------------------------|-----------------------------------------------------------------------------------------------------------------------|-----------------------------------------------------------------------------------------|-------------------------------------------------------------------------------------|
| ARGENTINA  | Ministerio de Salud                     | <a href="http://www.facebook.com/msalnacion">http://www.facebook.com/msalnacion</a>                                                                                                     | <a href="http://twitter.com/msalnacion">http://twitter.com/msalnacion</a>             | <a href="http://www.youtube.com/msalnacion">http://www.youtube.com/msalnacion</a>                               | <a href="https://plus.google.com/113411333997715470916/posts">https://plus.google.com/113411333997715470916/posts</a> |                                                                                         |                                                                                     |
| BOLIVIA    | Ministerio de Salud y Deportes          | <a href="https://www.facebook.com/minsaludbolivia">https://www.facebook.com/minsaludbolivia</a>                                                                                         | <a href="https://twitter.com/minsaludbolivia">https://twitter.com/minsaludbolivia</a> | <a href="http://www.youtube.com/user/MinSaludBolivia">http://www.youtube.com/user/MinSaludBolivia</a>           |                                                                                                                       |                                                                                         |                                                                                     |
| CHILE      | Ministerio de Salud                     | <a href="https://www.facebook.com/pages/Ministerio-de-Salud-Chile/273168169362020?ref=ts">https://www.facebook.com/pages/Ministerio-de-Salud-Chile/273168169362020?ref=ts</a>           | <a href="http://twitter.com/ministeriosalud">http://twitter.com/ministeriosalud</a>   | <a href="http://www.youtube.com/user/ministeriosaludchile">http://www.youtube.com/user/ministeriosaludchile</a> |                                                                                                                       | <a href="http://www.flickr.com/photos/minsal/">http://www.flickr.com/photos/minsal/</a> |                                                                                     |
| COLOMBIA   | Ministerio de Salud y protección social | <a href="https://www.facebook.com/MinSaludCol">https://www.facebook.com/MinSaludCol</a>                                                                                                 | <a href="https://twitter.com/MinSaludCol">https://twitter.com/MinSaludCol</a>         | <a href="http://www.youtube.com/user/MinSaludColPrensa">http://www.youtube.com/user/MinSaludColPrensa</a>       | <a href="https://plus.google.com/+MinSaludColPrensa/posts">https://plus.google.com/+MinSaludColPrensa/posts</a>       |                                                                                         | <a href="https://instagram.com/minsaludcol/">https://instagram.com/minsaludcol/</a> |
| COSTA RICA | Ministerio de salud                     | <a href="http://www.facebook.com/pages/Ministerio-de-Salud-de-Costa-Rica/486567330136?fref=ts">http://www.facebook.com/pages/Ministerio-de-Salud-de-Costa-Rica/486567330136?fref=ts</a> | <a href="https://twitter.com/msaludcr">https://twitter.com/msaludcr</a>               |                                                                                                                 |                                                                                                                       |                                                                                         |                                                                                     |
| CUBA       | Infomed. Portal de                      |                                                                                                                                                                                         |                                                                                       |                                                                                                                 |                                                                                                                       |                                                                                         |                                                                                     |

**Additional file 2. Presence of national health authorities on social media.**

| Country        | Ministry                                        | Facebook                                                                                                                                                                      | Twitter                                                                             | Youtube                                                                                                                                               | Google+                                                                                                               | Flickr                                                                                            | Instagram |
|----------------|-------------------------------------------------|-------------------------------------------------------------------------------------------------------------------------------------------------------------------------------|-------------------------------------------------------------------------------------|-------------------------------------------------------------------------------------------------------------------------------------------------------|-----------------------------------------------------------------------------------------------------------------------|---------------------------------------------------------------------------------------------------|-----------|
|                | Salud de Cuba                                   |                                                                                                                                                                               |                                                                                     |                                                                                                                                                       |                                                                                                                       |                                                                                                   |           |
| DOMINICAN REP. | Ministerio de Salud Pública                     | <a href="https://www.facebook.com/SaludPublicaRD">https://www.facebook.com/SaludPublicaRD</a>                                                                                 | <a href="https://twitter.com/saludpublicard">https://twitter.com/saludpublicard</a> | <a href="https://www.youtube.com/user/SaludPublicaRD">https://www.youtube.com/user/SaludPublicaRD</a>                                                 |                                                                                                                       |                                                                                                   |           |
| ECUADOR        | Ministerio de Salud Pública                     | <a href="https://www.facebook.com/SaludEcuador">https://www.facebook.com/SaludEcuador</a>                                                                                     | <a href="https://twitter.com/Salud_Ec">https://twitter.com/Salud_Ec</a>             | <a href="http://www.youtube.com/user/EcuadorSalud">http://www.youtube.com/user/EcuadorSalud</a>                                                       |                                                                                                                       | <a href="http://www.flickr.com/photos/saludecuador">http://www.flickr.com/photos/saludecuador</a> |           |
| EL SALVADOR    | Ministerio de Salud                             | <a href="http://www.facebook.com/salud.sv">http://www.facebook.com/salud.sv</a>                                                                                               | <a href="http://twitter.com/minsalud">http://twitter.com/minsalud</a>               | <a href="http://www.youtube.com/comunicacionesminsal">http://www.youtube.com/comunicacionesminsal</a>                                                 |                                                                                                                       |                                                                                                   |           |
| GUATEMALA      | Ministerio de Salud Pública y Asistencia Social | <a href="https://www.facebook.com/Ministerio deSaludPublicayAsistenciaSocial?pnref=story">https://www.facebook.com/Ministerio deSaludPublicayAsistenciaSocial?pnref=story</a> | <a href="https://twitter.com/saludguatemala">https://twitter.com/saludguatemala</a> | <a href="http://www.youtube.com/user/webmasterSigsMspas?feature=sub_widget_1">http://www.youtube.com/user/webmasterSigsMspas?feature=sub_widget_1</a> | <a href="https://plus.google.com/114942600761182309447/posts">https://plus.google.com/114942600761182309447/posts</a> |                                                                                                   |           |
| HONDURAS       | Secretaría de Salud                             | <a href="https://www.facebook.com/saludhn/info?tab=page_info">https://www.facebook.com/saludhn/info?tab=page_info</a>                                                         | <a href="https://twitter.com/saludhn">https://twitter.com/saludhn</a>               |                                                                                                                                                       |                                                                                                                       |                                                                                                   |           |
| MEXICO         | Secretaría de Salud                             | <a href="https://www.facebook.com/Secretaria deSaludMX">https://www.facebook.com/Secretaria deSaludMX</a>                                                                     | <a href="https://twitter.com/SSalud_mx">https://twitter.com/SSalud_mx</a>           | <a href="http://www.youtube.com/user/ssaludmex">http://www.youtube.com/user/ssaludmex</a>                                                             |                                                                                                                       |                                                                                                   |           |
| NICARAGUA      | Ministerio de Salud                             |                                                                                                                                                                               |                                                                                     |                                                                                                                                                       |                                                                                                                       |                                                                                                   |           |

**Additional file 2. Presence of national health authorities on social media.**

| Country   | Ministry                                       | Facebook                                                                                                                    | Twitter                                                                                                                                                                       | Youtube                                                                                                                                   | Google+ | Flickr                                                                                          | Instagram |
|-----------|------------------------------------------------|-----------------------------------------------------------------------------------------------------------------------------|-------------------------------------------------------------------------------------------------------------------------------------------------------------------------------|-------------------------------------------------------------------------------------------------------------------------------------------|---------|-------------------------------------------------------------------------------------------------|-----------|
| PANAMA    | Ministerio de Salud                            | <a href="https://www.facebook.com/minsapanama">https://www.facebook.com/minsapanama</a>                                     | <a href="https://twitter.com/minsa_panama">https://twitter.com/minsa_panama</a>                                                                                               | <a href="http://www.youtube.com/user/MINSA_PMA">http://www.youtube.com/user/MINSA_PMA</a>                                                 |         |                                                                                                 |           |
| PARAGUAY  | Ministerio de Salud Pública y Bienestar Social | <a href="http://www.facebook.com/ministeriodesaludparaguay?f=ts">http://www.facebook.com/ministeriodesaludparaguay?f=ts</a> | <a href="http://www.mspbs.gov.py/v3/wp-content/themes/graphene/images/social/twitter.png">http://www.mspbs.gov.py/v3/wp-content/themes/graphene/images/social/twitter.png</a> | <a href="http://www.youtube.com/user/comunicacionensalud?feature=watch">http://www.youtube.com/user/comunicacionensalud?feature=watch</a> |         |                                                                                                 |           |
| PERU      | Ministerio de Salud                            | <a href="http://www.facebook.com/minsaperu?v=wall">http://www.facebook.com/minsaperu?v=wall</a>                             | <a href="http://twitter.com/#!/Minsa_Peru">http://twitter.com/#!/Minsa_Peru</a>                                                                                               | <a href="http://www.youtube.com/user/minsaperu1#p/u">http://www.youtube.com/user/minsaperu1#p/u</a>                                       |         | <a href="https://www.flickr.com/photos/minsaperu/">https://www.flickr.com/photos/minsaperu/</a> |           |
| URUGUAY   | Ministerio de Salud Pública                    | <a href="https://www.facebook.com/MSPUruguay?rf=284193221592796">https://www.facebook.com/MSPUruguay?rf=284193221592796</a> | <a href="https://twitter.com/mspuruguay">https://twitter.com/mspuruguay</a>                                                                                                   |                                                                                                                                           |         |                                                                                                 |           |
| VENEZUELA | Ministerio del Poder Popular para la Salud     |                                                                                                                             | <a href="https://twitter.com/mpps salud_vzla">https://twitter.com/mpps salud_vzla</a>                                                                                         |                                                                                                                                           |         |                                                                                                 |           |
