# Supplementary material for: Social media in public health: an analysis of national health authorities and leading causes of death in Spanish-speaking Latin American and Caribbean countries
Source: Springer Nature journal article supplement (doi:10.1186/s12911-017-0411-y), 2017-02-03
Supplement: MOESM3 [file 12043626]

### Additional file 3. Analysis of the use of Facebook, Twitter and YouTube by national health authorities

#### Facebook

| Country    | Nbr. followers | Pos ts per day | Users' post per day | Comments in fans' posts | Fans' posts | "Shares " per post | "Comm ents" per post | "Likes" per post | Numb er of "Share s" | Numb er of "Com ments " | Numb er of "Likes " | Numbe r of posts | Total of "Likes", "Comments", "Shares" | Growth (total) | Daily (%) | Percentage of increase from time of start | Total of users' posts, total of "Likes", "Comments" and "Shares" | Videos (time-sec.) |
|------------|----------------|----------------|---------------------|-------------------------|-------------|--------------------|----------------------|------------------|----------------------|-------------------------|---------------------|------------------|----------------------------------------|----------------|-----------|-------------------------------------------|------------------------------------------------------------------|--------------------|
| Argentina  | 221511         | 1,781,420,765  | 0                   | 0                       | 0           | 3,483,404,908      | 1,757,055,215        | 5,166,717,791    | 113559               | 5728                    | 168435              | 326              | 287722                                 | 25154          | 12,79%    | 12,79%                                    | 0                                                                | 0                  |
| Bolivia    | 7400           | 5,2            | 0                   | 0                       | 0           | 1,7                | 0,4                  | 11               | 1600                 | 379                     | 10000               | 956              | 12000                                  | 122            | 1,7%      | 1,7%                                      | 0                                                                | 254                |
| Chile      | 71073          | 7,710,382,514  | 0                   | 0                       | 0           | 2,871,367,824      | 291,070,163          | 7,345,641,389    | 40515                | 4107                    | 103647              | 1411             | 148269                                 | 5042           | 7,62%     | 7,62%                                     | 0                                                                | 0                  |
| Colombia   | 36257          | 1,617,486,339  | 1,519,125,683       | 26                      | 278         | 6,491,891,892      | 7,381,756,757        | 1,371,655,405    | 19216                | 2185                    | 40601               | 296              | 62002                                  | 3191           | 9,65%     | 9,65%                                     | 94                                                               | 103                |
| Costa Rica | 70355          | 92,896,175     | 1,535,519,126       | 79                      | 281         | 5,305,882,353      | 5                    | 6,341,176,471    | 902                  | 85                      | 1078                | 17               | 2065                                   | 1795           | 2,62%     | 2,62%                                     | 362                                                              | 219                |
| Ecuador    | 72975          | 131,147,541    | 1,071,038,251       | 30                      | 196         | 407,625            | 7,083,333,333        | 9,727,083,333    | 9783                 | 1700                    | 23345               | 240              | 34828                                  | 22540          | 44,69%    | 44,69%                                    | 126                                                              | 0                  |

### Additional file 3. Analysis of the use of Facebook, Twitter and YouTube by national health authorities

| Country     | Nbr. followers | Pos ts per day | Users' post per day | Comments in fans' posts | Fans' posts | "Shares " per post | "Comm ents" per post | "Likes" per post | Numb er of "Share s" | Numb er of "Com ments " | Numb er of "Likes " | Numbe r of posts | Total of "Likes", "Comments", "Shares" | Growth (total) | Daily (%) | Percentage of increase from time of start | Total of users' posts, total of "Likes", "Comments" and "Shares" | Videos (time-sec.) |
|-------------|----------------|----------------|---------------------|-------------------------|-------------|--------------------|----------------------|------------------|----------------------|-------------------------|---------------------|------------------|----------------------------------------|----------------|-----------|-------------------------------------------|------------------------------------------------------------------|--------------------|
| El Salvador | 11481          | 1,666,667      | 530,054,645         | 28                      | 97          | 7,016,393,443      | 108,852,459          | 2,456,393,443    | 2140                 | 332                     | 7492                | 305              | 9964                                   | 470            | 4,27%     | 4,27%                                     | 60                                                               | 98                 |
| Guatemala   | 6016           | 1,595,628,415  | 0                   | 0                       | 0           | 1,107,876,712      | 77,739,726           | 1,637,328,767    | 3235                 | 227                     | 4781                | 292              | 8243                                   | 424            | 7,57%     | 7,57%                                     | 0                                                                | 0                  |
| Honduras    | 1960           | 2,759,562,842  | 71,038,251          | 0                       | 13          | 3,871,287,129      | 497,029,703          | 1,637,821,782    | 1955                 | 251                     | 8271                | 505              | 10477                                  | 124            | 6,75%     | 6,75%                                     | 0                                                                | 31                 |
| México      | 158021         | 6,715,846,995  | 0                   | 0                       | 0           | 1,462,034,174      | 3,362,896,664        | 2,022,595,606    | 179684               | 4133                    | 248577              | 1229             | 432394                                 | 49593          | 45,59%    | 45,59%                                    | 0                                                                | 809                |
| Panamá      | 24858          | 612,021,858    | 333,333,333         | 3                       | 61          | 5,142,857,143      | 964,285,714          | 1,616,071,429    | 576                  | 108                     | 1810                | 112              | 2494                                   | 46             | 0,19%     | 0,19%                                     | 7                                                                | 57                 |
| Paraguay    | 22823          | 1,021,311      | 1,191,256,831       | 56                      | 218         | 6,685,928,304      | 455,323,703          | 2,029,320,492    | 12496                | 851                     | 37928               | 1869             | 51275                                  | 385            | 1,72%     | 1,72%                                     | 108                                                              | 0                  |

### Additional file 3. Analysis of the use of Facebook, Twitter and YouTube by national health authorities

| Country         | Nbr. followers | Pos ts per day                | Users' post per day | Comments in fans' posts | Fans' posts | "Shares" per post | "Comm ents" per post | "Likes" per post  | Numb er of "Share s" | Numb er of "Com ments " | Numb er of "Likes " | Numbe r of posts | Total of "Likes", "Comments", "Shares" | Growth (total) | Daily (%) | Percentage of increase from time of start | Total of users' posts, total of "Likes", "Comments" and "Shares" | Videos (time-sec.) |
|-----------------|----------------|-------------------------------|---------------------|-------------------------|-------------|-------------------|----------------------|-------------------|----------------------|-------------------------|---------------------|------------------|----------------------------------------|----------------|-----------|-------------------------------------------|------------------------------------------------------------------|--------------------|
|                 |                | ,47<br>5                      |                     |                         |             |                   |                      |                   |                      |                         |                     |                  |                                        |                |           |                                           |                                                                  |                    |
| Perú            | 137313         | 1,2<br>97,<br>814<br>,20<br>8 | 0                   | 0                       | 0           | 5,107,91<br>5,789 | 4,279,5<br>78,947    | 1,262,9<br>38,947 | 12131<br>3           | 10164                   | 29994<br>8          | 2375             | 431425                                 | 22999          | 20,08%    | 20,08%                                    | 0                                                                | 5331               |
| Rep. Dominicana | 11477          | 2,0<br>21,<br>857<br>,92<br>3 | 0                   | 0                       | 0           | 4,2               | 421,621<br>,622      | 9,035,1<br>35,135 | 1554                 | 156                     | 3343                | 370              | 5053                                   | 337            | 3,02%     | 3,02%                                     | 0                                                                | 0                  |
| Uruguay         | 2822           | 426<br>,22<br>,95<br>08       | 322,404,<br>372     | 13                      | 59          | 3,101,28<br>2,051 | 1,282,0<br>51,282    | 2,608,9<br>74,359 | 2419                 | 100                     | 2035                | 78               | 4554                                   | 172            | 6,49%     | 6,49%                                     | 60                                                               | 326                |
|                 |                |                               |                     |                         |             |                   |                      |                   |                      |                         |                     |                  |                                        |                |           |                                           |                                                                  |                    |
|                 | 57000          | 3,8                           | 0,4                 | 16                      | 80          | 54                | 3,6                  | 90                | 34000                | 2000                    | 64000               | 692              | 100000                                 | 8800           | 12%       | 12%                                       | 54                                                               | 482                |

Source: Facebook.com / Fanpagekarma.com

### Additional file 3. Analysis of the use of Facebook, Twitter and YouTube by national health authorities

#### Twitter

| Country        | Page                                                      | Tweets | Tweets-day  | Favorites | Retweets | Conversations | Retweets and Favorites | Followers | Retweets and Favorites/tweet | Favorites/tweet | Retweets/tweet | Interactions/tweet |
|----------------|-----------------------------------------------------------|--------|-------------|-----------|----------|---------------|------------------------|-----------|------------------------------|-----------------|----------------|--------------------|
| Argentina      | Ministerio de Salud de la Nación Argentina                | 741    | 4.049180328 | 6429      | 10370    | 0.00%         | 16799                  | 109608    | 13.99                        | 8.67            | 5.32           | 0.02%              |
| Bolivia        | Ministerio de Salud y Deportes, Bolivia                   | 908    | 4.961748634 | 1189      | 1098     | 0.44%         | 2287                   | 4964      | 1.2                          | 1.3             | 0.1            | 0.06%              |
| Chile          | Ministerio de Salud - Chile                               | 930    | 5.081967213 | 2406      | 8734     | 3.66%         | 11140                  | 106539    | 9.39                         | 2.58            | 6.81           | 0.01%              |
| Colombia       | Ministerio de Salud y Protección Social Colombia          | 3060   | 16.72131148 | 8274      | 12830    | 0.23%         | 21104                  | 172519    | 4.19                         | 2.7             | 1.49           | 0.00%              |
| Costa Rica     | Ministerio de Salud de Costa Rica                         | 32     | 0.174863388 | 14        | 21       | 3.13%         | 35                     | 37462     | 0.65                         | 0.43            | 0.22           | 0.00%              |
| Dominican Rep. | Ministerio de Salud Pública Rep. Dominicana               | 856    | 4.677595628 | 601       | 2456     | 0.00%         | 3057                   | 29285     | 2.86                         | 0.7             | 2.16           | 0.01%              |
| Ecuador        | Ministerio Salud Ecuador                                  | 1863   | 10.18032787 | 4046      | 12342    | 18.25%        | 16388                  | 162723    | 6.62                         | 2.17            | 4.45           | 0.01%              |
| El Salvador    | Ministerio de Salud de El Salvador                        | 1409   | 7.699453552 | 1411      | 2628     | 11.85%        | 4039                   | 34165     | 1.86                         | 1               | 0.86           | 0.01%              |
| Guatemala      | Ministerio de Salud Pública y Asistencia Social Guatemala | 462    | 2.524590164 | 231       | 616      | 7.79%         | 847                    | 4215      | 1.33                         | 0.5             | 0.83           | 0.05%              |
| Honduras       | Secretaría de Salud Honduras 2014-2018                    | 1005   | 5.491803279 | 3743      | 14278    | 0.50%         | 18021                  | 3074      | 14.2                         | 3.72            | 10.48          | 0.69%              |
| Mexico         | Secretaría de Salud México                                | 2088   | 11.40983607 | 16447     | 39717    | 0.00%         | 56164                  | 305762    | 19.02                        | 7.87            | 11.15          | 0.01%              |

### Additional file 3. Analysis of the use of Facebook, Twitter and YouTube by national health authorities

| Country   | Page                                  | Tweets | Tweets-day  | Favorites | Retweets | Conversations | Retweets and Favorites | Followers | Retweets and Favorites/tweet | Favorites/tweet | Retweets/tweet | Interactions/tweet |
|-----------|---------------------------------------|--------|-------------|-----------|----------|---------------|------------------------|-----------|------------------------------|-----------------|----------------|--------------------|
| Panamá    | MINSA Panama                          | 832    | 4.546448087 | 2292      | 4164     | 0.72%         | 6456                   | 25804     | 5                            | 2.75            | 2.25           | 0.03%              |
| Paraguay  | Ministerio de Salud - Paraguay        | 755    | 4.12568306  | 941       | 1791     | 2.52%         | 2732                   | 36000     | 2.37218543                   | 1.246357616     | 1.13           | 0.01%              |
| Peru      | Ministerio de Salud del Perú          | 1866   | 10.19672131 | 4267      | 7179     | 0.96%         | 11446                  | 205302    | 3.84                         | 2.28            | 1.56           | 0.00%              |
| Uruguay   | Ministerio de Salud Pública - Uruguay | 478    | 2.612021858 | 1529      | 1571     | 2.09%         | 3100                   | 2384      | 3.28                         | 3.19            | 0.09           | 0.36%              |
| Venezuela | Ministero Salud - Venezuela           | 3510   | 19.18032787 | 1565      | 16894    | 0.48%         | 18459                  | 23357     | 4.81                         | 0.44            | 4.37           | 0.02%              |
|           | Mean values                           | 1300   | 7.1         | 3400      | 8500     | 3.30%         | 12000                  | 81000     | 5.9                          | 2.6             | 3.3            | 0.08%              |

Source: [Twitter.com](https://twitter.com) / [Fanpagekarma.com](https://fanpagekarma.com)

### Additional file 3. Analysis of the use of Facebook, Twitter and YouTube by national health authorities

#### Youtube

| Page                                                    | Number of followers | Number of total views | Number of total videos | Number of videos | Number of total views | Number of views per video | Like | Don't like | Comments |
|---------------------------------------------------------|---------------------|-----------------------|------------------------|------------------|-----------------------|---------------------------|------|------------|----------|
| ministeriosaludchile                                    | 2047                | 3865983               | 136                    | 26               | 1079331               | 4,151,273,077             | 375  | 147        | 136      |
| minsalud bolivia                                        | 110                 | 38087                 | 198                    | 8                | 1247                  | 155,875                   | 8    | 0          | 0        |
| Minsa Panama                                            | 57                  | 15016                 | 106                    | 15               | 1100                  | 7,333,333,333             | 13   | 0          | 2        |
| Minsa Peru                                              | 1212                | 497487                | 750                    | 135              | 44983                 | 3,332,074,074             | 207  | 7          | 23       |
| comunicacionensalud                                     | 96                  | 37938                 | 207                    | 24               | 1445                  | 6,020,833,333             | 17   | 0          | 1        |
| SaludPublicaRD                                          | 110                 | 27861                 | 47                     | 4                | 723                   | 180,75                    | 2    | 0          | 6        |
| MinSaludCol                                             | 2031                | 3581313               | 432                    | 72               | 686414                | 9,533,527,778             | 226  | 71         | 47       |
| MsalNacion                                              | 2031                | 1115157               | 845                    | 90               | 103814                | 1,153,488,889             | 473  | 26         | 50       |
| ssaludmex                                               | 1012                | 2623881               | 380                    | 8                | 8239                  | 1,029,875                 | 70   | 8          | 6        |
| Ministerio de Salud El Salvador                         | 186                 | 81664                 | 267                    | 15               | 1198                  | 7,986,666,667             | 5    | 0          | 0        |
| Salud Ecuador                                           | 749                 | 244662                | 248                    | 26               | 8116                  | 3,121,538,462             | 38   | 6          | 5        |
| Ministerio de Salud Pública y Asistencia Social (MSPAS) | 94                  | 37308                 | 138                    | 13               | 1248                  | 96                        | 1    | 0          | 3        |
| Mean values                                             | 811                 | 1000000               | 313                    | 36               | 161000                | 4500                      | 120  | 22         | 23       |

Source: Youtube.com / Fanpagekarma.com
