# Supplementary material for: Social media in public health: an analysis of national health authorities and leading causes of death in Spanish-speaking Latin American and Caribbean countries
Source: Springer Nature journal article supplement (doi:10.1186/s12911-017-0411-y), 2017-02-03
Supplement: MOESM4 [file 12043626]

**Additional file 4. Population with Internet access following national health authorities by country on Facebook, Twitter and Youtube.**

| <b>Country</b>     | <b>Population</b> | <b>Internet population within a country</b> | <b>Internet population within a country (%)</b> | <b>Facebook (users who follow national health authority)</b> | <b>Facebook Internet access vs Followers (%)</b> | <b>Twitter (users who follow national health authority)</b> | <b>Twitter Internet access vs Followers (%)</b> | <b>Youtube (users who follow national health authority)</b> | <b>Youtube Internet access vs Followers (%)</b> |
|--------------------|-------------------|---------------------------------------------|-------------------------------------------------|--------------------------------------------------------------|--------------------------------------------------|-------------------------------------------------------------|-------------------------------------------------|-------------------------------------------------------------|-------------------------------------------------|
| Argentina          | 42,980,026        | 27,808,077                                  | 64.70                                           | 221,511                                                      | 0,79                                             | 109,608                                                     | 0,39                                            | 2,031                                                       | 0,0007                                          |
| Bolivia            | 10,561,887        | 4,121,248                                   | 39.02                                           | 7,400                                                        | 0,17                                             | 4,964                                                       | 0,12                                            | 110                                                         | 0,002                                           |
| Chile              | 17,762,647        | 12,851,275                                  | 72.35                                           | 71,073                                                       | 0,55                                             | 106,539                                                     | 0,82                                            | 2,047                                                       | 0,01                                            |
| Colombia           | 47,791,393        | 25,123,935                                  | 52.57                                           | 36,257                                                       | 0,14                                             | 172,519                                                     | 0,68                                            | 2,031                                                       | 0,008                                           |
| Costa Rica         | 4,757,606         | 2,350,733                                   | 49.41                                           | 70,355                                                       | 2,99                                             | 37,462                                                      | 1,59                                            | -                                                           | -                                               |
| Cuba               | 11,379,111        | 3,413,733                                   | 30.00                                           | -                                                            | -                                                | -                                                           | -                                               | -                                                           | -                                               |
| Dominican Republic | 10,405,943        | 5,159,267                                   | 49.58                                           | 11,477                                                       | 0,22                                             | 29,285                                                      | 0,56                                            | 110                                                         | 0,002                                           |
| Ecuador            | 15,902,916        | 6,838,254                                   | 43.00                                           | 72,975                                                       | 1,06                                             | 162,723                                                     | 2,37                                            | 749                                                         | 0,01                                            |
| El Salvador        | 6,107,706         | 1,813,989                                   | 29.70                                           | 11,481                                                       | 0,63                                             | 34,165                                                      | 1,88                                            | 186                                                         | 0,01                                            |
| Guatemala          | 16,015,494        | 3,747,626                                   | 23.40                                           | 6,016                                                        | 0,16                                             | 4,215                                                       | 0,11                                            | 94                                                          | 0,002                                           |
| Honduras           | 7,961,680         | 1,519,089                                   | 19.08                                           | 1,960                                                        | 0,13                                             | 3,074                                                       | 0,20                                            | -                                                           | -                                               |
| Mexico             | 125,385,833       | 55,658,771                                  | 44.39                                           | 158,021                                                      | 0,28                                             | 305,762                                                     | 0,54                                            | 1,012                                                       | 0,001                                           |
| Nicaragua          | 6,013,913         | 1,058,449                                   | 17.60                                           | -                                                            | -                                                | -                                                           | -                                               | -                                                           | -                                               |
| Panama             | 3,867,535         | 1,737,297                                   | 44.92                                           | 24,858                                                       | 1,43                                             | 25,804                                                      | 1,48                                            | 57                                                          | 0,003                                           |
| Paraguay           | 6,552,518         | 2,817,583                                   | 43.00                                           | 22,823                                                       | 0,81                                             | 36,000                                                      | 1,27                                            | 96                                                          | 0,003                                           |
| Peru               | 30,973,148        | 12,451,205                                  | 40.20                                           | 137,313                                                      | 1,10                                             | 205,302                                                     | 1,64                                            | 1,212                                                       | 0,009                                           |
| Uruguay            | 3,419,516         | 2,101,635                                   | 61.46                                           | 2,822                                                        | 0,13                                             | 2,384                                                       | 0,11                                            | -                                                           | -                                               |
| Venezuela          | 30,693,827        | 17,495,481                                  | 57.00                                           | -                                                            | -                                                | 23,357                                                      | 0,13                                            | -                                                           | -                                               |
| <b>Mean values</b> |                   | <b>10,448,202</b>                           | <b>43.41</b>                                    |                                                              | <b>0,79</b>                                      |                                                             | <b>0,86</b>                                     |                                                             | <b>0,005</b>                                    |

*Source: The World Bank Group (WB), International Telecommunication Union (ITU), Owloo.*
