# Supplementary material for: Social media in public health: an analysis of national health authorities and leading causes of death in Spanish-speaking Latin American and Caribbean countries
Source: Springer Nature journal article supplement (doi:10.1186/s12911-017-0411-y), 2017-02-03
Supplement: MOESM5 [file 12043626]

**Additional file 5. Comparison of activity rate and information retrieval on Facebook and Twitter**

| <b>Country</b>     | <b>Activity Rate on Facebook</b> | <b>Number of leading causes of death found on Facebook</b> | <b>Leading causes of death found on Facebook</b>                                            | <b>Activity Rate on Twitter</b> | <b>Number of leading causes of death found on Twitter</b> | <b>Leading causes of death found on Twitter</b>                     |
|--------------------|----------------------------------|------------------------------------------------------------|---------------------------------------------------------------------------------------------|---------------------------------|-----------------------------------------------------------|---------------------------------------------------------------------|
| Argentina          | 1.29                             | 1                                                          | - Hypertensive heart disease                                                                | 0.15                            | 1                                                         | - Stroke                                                            |
| Bolivia            | 1.62                             | 2                                                          | - Diabetes<br>- Acute lower respiratory infection                                           | 0.46                            | 3                                                         | - Stroke<br>- Diabetes<br>- Alzheimer's disease                     |
| Chile              | 2.08                             | 4                                                          | - Stroke<br>- Stomach cancer<br>- Diabetes<br>- Alzheimer's disease                         | 0.1                             | 4                                                         | - Stroke<br>- Stomach cancer<br>- Diabetes<br>- Alzheimer's disease |
| Colombia           | 1.71                             | 4                                                          | - Stroke<br>- Congenital anomalies<br>- Diabetes<br>- Acute lower respiratory infection     | 0.12                            | 3                                                         | - Diabetes<br>- Traffic accidents<br>- Interpersonal violence       |
| Costa Rica         | 0.02                             | 0                                                          |                                                                                             | 0.00093                         | 0                                                         |                                                                     |
| Cuba               | -                                | -                                                          |                                                                                             | -                               | -                                                         |                                                                     |
| Dominican Republic | 0.44                             | 5                                                          | - Stroke<br>- Diabetes<br>- Hypertensive heart disease<br>- Traffic accidents<br>- HIV/AIDS | 0.1                             | 3                                                         | - Stroke<br>- Diabetes<br>- Traffic accidents                       |
| Ecuador            | 0.47                             | 2                                                          | - Diabetes<br>- HIV/AIDS                                                                    | 0.1                             | 2                                                         | - Stroke<br>- Diabetes                                              |

**Additional file 5. Comparison of activity rate and information retrieval on Facebook and Twitter**

| <b>Country</b> | <b>Activity Rate on Facebook</b> | <b>Number of leading causes of death found on Facebook</b> | <b>Leading causes of death found on Facebook</b>                                                | <b>Activity Rate on Twitter</b> | <b>Number of leading causes of death found on Twitter</b> | <b>Leading causes of death found on Twitter</b>                                                                                                    |
|----------------|----------------------------------|------------------------------------------------------------|-------------------------------------------------------------------------------------------------|---------------------------------|-----------------------------------------------------------|----------------------------------------------------------------------------------------------------------------------------------------------------|
| El Salvador    | 0.86                             | 5                                                          | - Diabetes<br>- Kidney disease<br>- Traffic accidents<br>- HIV/AIDS<br>- Interpersonal violence | 0.11                            | 7                                                         | - Stroke<br>- Diabetes<br>- Kidney disease<br>- Acute lower respiratory infection<br>- Traffic accidents<br>- HIV/AIDS<br>- Interpersonal violence |
| Guatemala      | 1.37                             | 5                                                          | - Stroke<br>- Diabetes<br>- Diarrheal disease<br>- HIV/AIDS<br>- Interpersonal violence         | 0.2                             | 4                                                         | - Stroke<br>- Diabetes<br>- Diarrheal disease<br>- HIV/AIDS                                                                                        |
| Honduras       | 5.34                             | 2                                                          | - HIV/AIDS<br>- Interpersonal violence                                                          | 5.86                            | 3                                                         | - Stroke<br>- HIV/AIDS<br>- Interpersonal violence                                                                                                 |
| Mexico         | 2.73                             | 4                                                          | - Stroke<br>- Diabetes<br>- Traffic accidents<br>- Interpersonal violence                       | 0.18                            | 3                                                         | - Stroke<br>- Diabetes<br>- Interpersonal violence                                                                                                 |
| Nicaragua      | -                                | -                                                          |                                                                                                 | -                               | -                                                         |                                                                                                                                                    |
| Panama         | 0.10                             | 1                                                          | - HIV/AIDS                                                                                      | 0.25                            | 1                                                         | - HIV/AIDS                                                                                                                                         |

**Additional file 5. Comparison of activity rate and information retrieval on Facebook and Twitter**

| <b>Country</b>     | <b>Activity Rate on Facebook</b> | <b>Number of leading causes of death found on Facebook</b> | <b>Leading causes of death found on Facebook</b>                                                                                                                                                                                                                                             | <b>Activity Rate on Twitter</b> | <b>Number of leading causes of death found on Twitter</b> | <b>Leading causes of death found on Twitter</b>                                                                                                        |
|--------------------|----------------------------------|------------------------------------------------------------|----------------------------------------------------------------------------------------------------------------------------------------------------------------------------------------------------------------------------------------------------------------------------------------------|---------------------------------|-----------------------------------------------------------|--------------------------------------------------------------------------------------------------------------------------------------------------------|
| Paraguay           | 2.24                             | 7                                                          | <ul style="list-style-type: none"> <li>- Congenital anomalies</li> <li>- Complications from premature birth</li> <li>- Diabetes</li> <li>- Hypertensive heart disease</li> <li>- Acute lower respiratory infection</li> <li>- Traffic accidents</li> <li>- Interpersonal violence</li> </ul> | 0.07                            | 4                                                         | <ul style="list-style-type: none"> <li>- Stroke</li> <li>- Diabetes</li> <li>- Hypertensive heart disease</li> <li>- Interpersonal violence</li> </ul> |
| Peru               | 3.14                             | 6                                                          | <ul style="list-style-type: none"> <li>- Stroke</li> <li>- Congenital anomalies</li> <li>- Stomach cancer</li> <li>- Diabetes</li> <li>- Acute lower respiratory infection</li> <li>- Traffic accidents</li> </ul>                                                                           | 0.05                            | 3                                                         | <ul style="list-style-type: none"> <li>- Stroke</li> <li>- Diabetes</li> <li>- Traffic accidents</li> </ul>                                            |
| Uruguay            | 1.61                             | 0                                                          |                                                                                                                                                                                                                                                                                              | 1.3                             | 3                                                         | <ul style="list-style-type: none"> <li>- Stroke</li> <li>- Alzheimer's disease</li> <li>- Acute lower respiratory infection</li> </ul>                 |
| Venezuela          | 1.29                             | -                                                          |                                                                                                                                                                                                                                                                                              | 0.79                            | 3                                                         | <ul style="list-style-type: none"> <li>- Stroke</li> <li>- Diabetes</li> <li>- Acute lower respiratory infection</li> </ul>                            |
| <b>Mean values</b> | <b>1.66</b>                      | <b>3.2</b>                                                 |                                                                                                                                                                                                                                                                                              | <b>0.61</b>                     | <b>2.93</b>                                               |                                                                                                                                                        |
